# Supplementary material for: A coal-derived carbon fiber scaffold with superior mechanical robustness for ultra-stable lithium metal anodes
Source: Royal Society of Chemistry journal article supplement (doi:10.1039/d5nj04564a), 2026-01-01
Supplement: d5nj04564a1.pdf [file d5nj04564a1.pdf]

## A Coal-Derived Carbon Fiber Scaffold with Superior Mechanical Robustness for Ultra-Stable Lithium Metal Anodes

Xian Lu <sup>a</sup>, Qingtao Ma<sup>a\*</sup>, Xiaoquan Zhu<sup>b\*</sup>, Mengjiao Xu<sup>a</sup>, Nannan Guo<sup>a</sup>, Lili Ai<sup>a</sup>, Changyu Leng<sup>a</sup>,  
Luxiang Wang<sup>a\*</sup>

<sup>a</sup>State Key Laboratory of Chemistry and Utilization of Carbon-Based Energy Resources, College of Chemistry, Xinjiang University, Urumqi 830017, Xinjiang, PR China

<sup>b</sup>College of Textiles and Clothing, Xinjiang University, Urumqi 830017, Xinjiang, PR China

\*Corresponding authors

E-mail: qingtaoma@xju.edu.cn; zhuxiaoquan@xju.edu.cn; wangluxiangxju@163.com

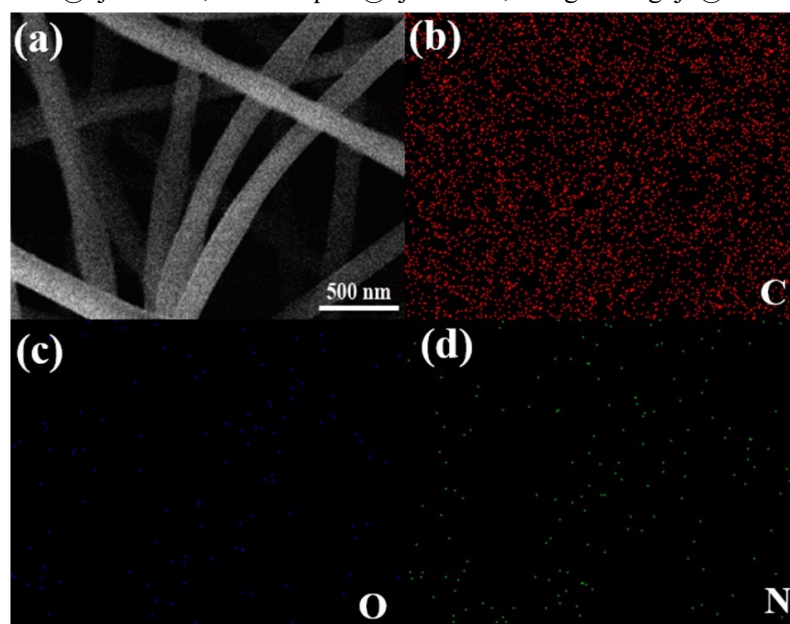

**Fig. S1.** (a) SEM plots and (b-d) corresponding elemental mappings of CBCNFs.

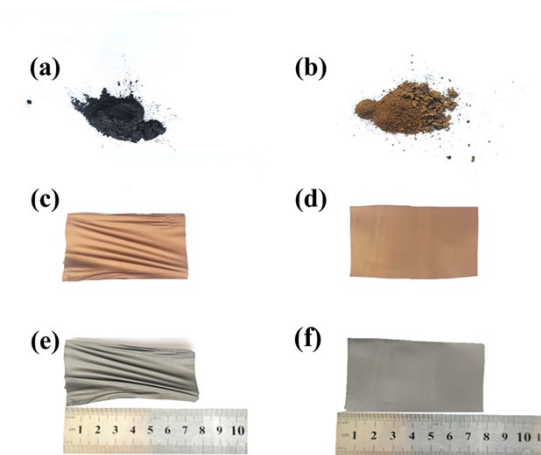

**Fig. S2.** Digital photograph of (a) raw coal, (b) oxidized coal, (c) CNFs and (d) CBCNFs after pre-oxidation and (e) CNFs and (f) CBCNFs after carbonation.

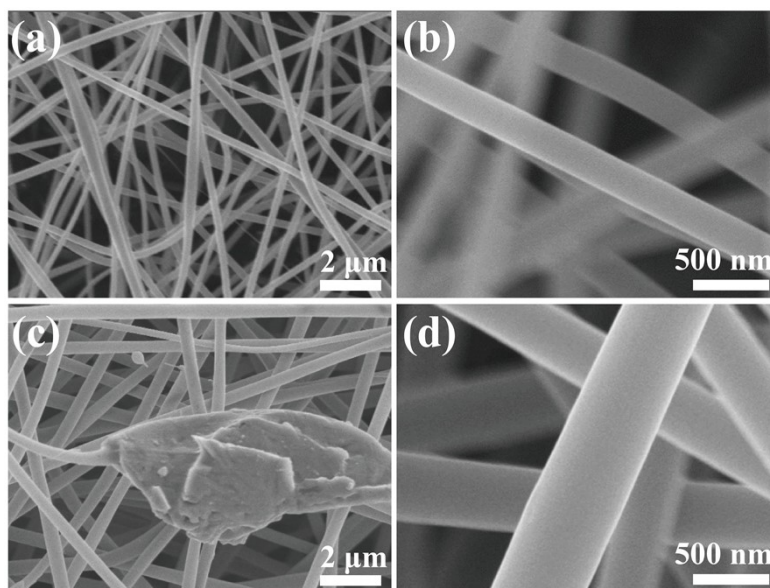

**Fig. S3.** Scanning electron microscope images of CBCNFs-1 (a-b) and CBCNFs-2 (c-d)

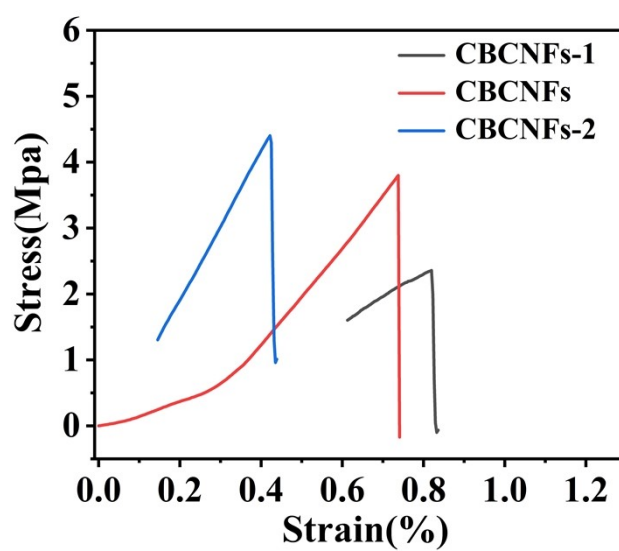

**Fig. S4.** Tensile strength of CBCNFs-1、CBCNFs and CBCNFs-2.

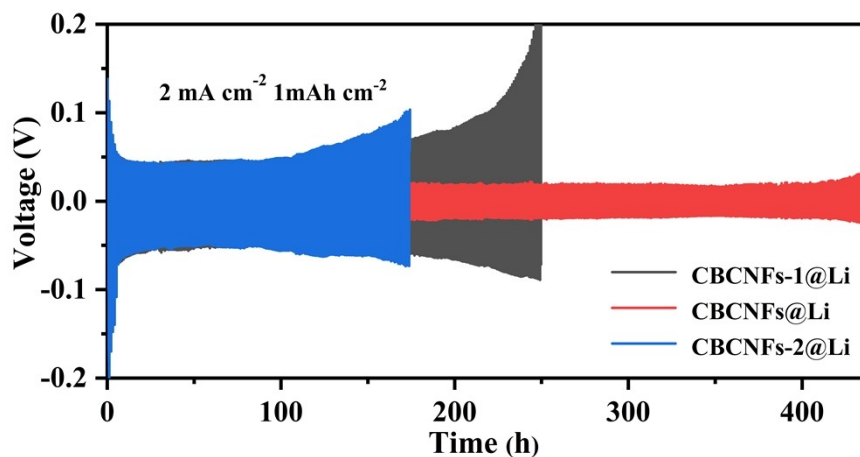

**Fig. S5.** The Voltage-time curves of CBCNFs-1@Li, CBCNFs@Li, and CBCNFs-2@Li symmetric batteries at a current density of  $2 \text{ mA cm}^{-2}$  and an area capacity of  $1 \text{ mAh cm}^{-2}$ .

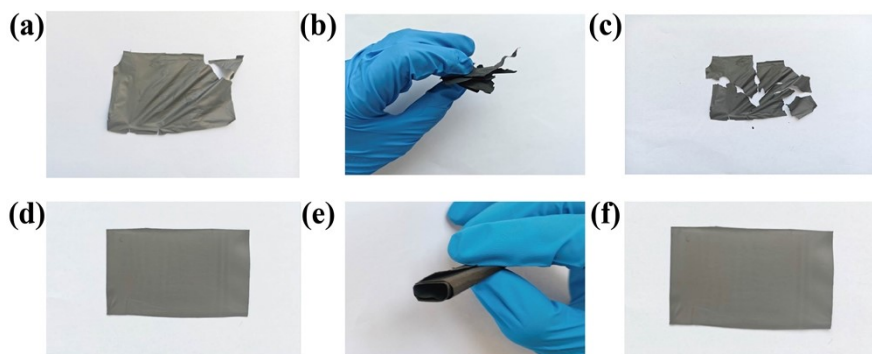

**Fig. S6.** Flexibility tests of (a-c) CNFs, (d-f) CBCNFs.

**Table S1.** Specific surface area and pore structure parameters of the samples.

| Samples | <sup>a</sup> S <sub>BET</sub><br>m <sup>2</sup> g <sup>-1</sup> | <sup>b</sup> V <sub>total</sub><br>cm <sup>3</sup> g <sup>-1</sup> | <sup>c</sup> V <sub>micro</sub><br>cm <sup>3</sup> g <sup>-1</sup> | V <sub>micro</sub> /V <sub>total</sub><br>% | <sup>e</sup> D <sub>ap</sub><br>nm |
|---------|-----------------------------------------------------------------|--------------------------------------------------------------------|--------------------------------------------------------------------|---------------------------------------------|------------------------------------|
| CNFs    | 436.27                                                          | 0.189                                                              | 0.124                                                              | 65.61                                       | 1.70                               |
| CBCNFs  | 551.25                                                          | 0.187                                                              | 0.154                                                              | 82.35                                       | 1.36                               |

**Table S2.** summary of elemental content analysis of XPS spectra of prepared samples.

| Sample | C 1s (at%) | N 1s (at%) | O 1s (at%) |
|--------|------------|------------|------------|
| CNFs   | 85.13      | 10.33      | 4.54       |
| CBCNFs | 86.21      | 5.72       | 7.75       |

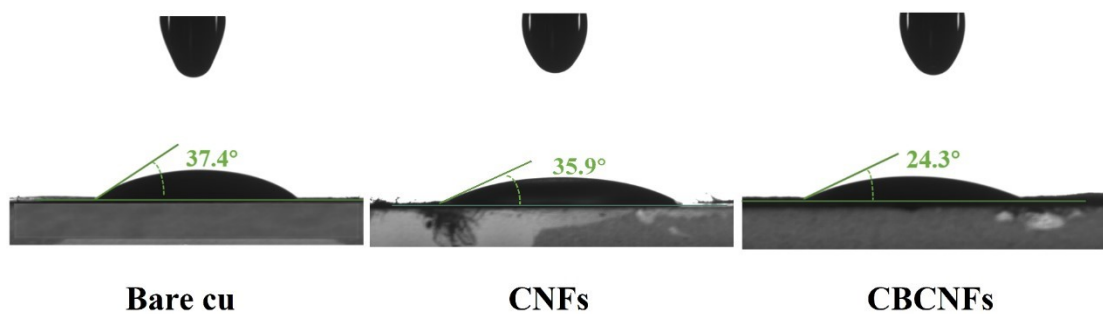

**Fig. S7.** Contact angle of ether-based electrolyte droplets on (a) bare copper, (b) CNFs, and (c) CBCNFs.

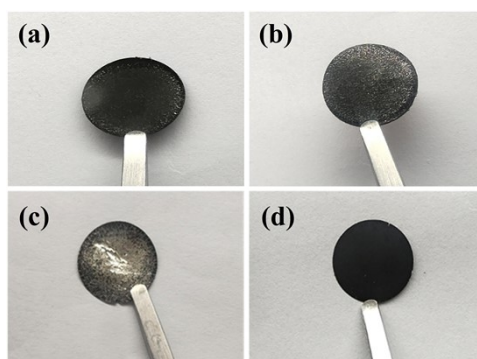

**Fig. S8.** Digital photograph of CBCNFs at different lithium plating capacities: (a) 5 mAh cm<sup>-2</sup>, (b) 8 mAh cm<sup>-2</sup>, (c) 10 mAh cm<sup>-2</sup>, (d) after being charged to 1 V.

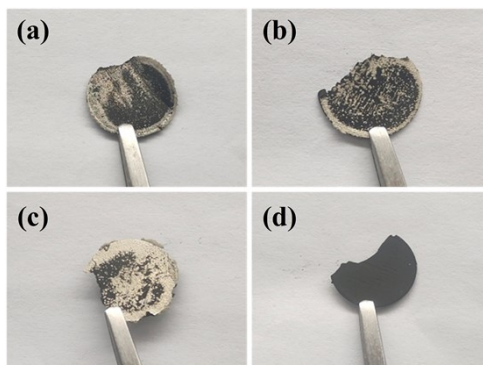

**Fig. S9.** Digital photograph of CNFs at different lithium plating capacities: (a) 5 mAh cm<sup>-2</sup>, (b) 8 mAh cm<sup>-2</sup>, (c) 10 mAh cm<sup>-2</sup>, (d) after being charged to 1 V.



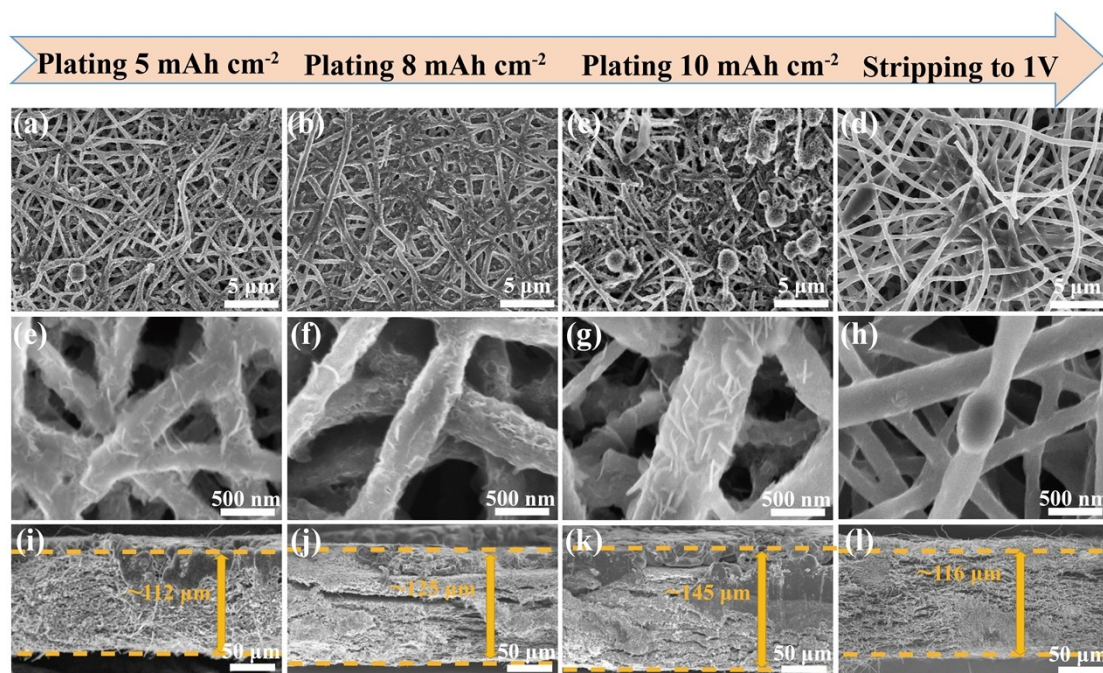

**Fig. S10.** The SEM images of CNFs after different lithium depositions are (a, e)  $5 \text{ mAh cm}^{-2}$ , (b, f)  $8 \text{ mAh cm}^{-2}$ , (c, g)  $10 \text{ mAh cm}^{-2}$  and (d, h) corresponding cross-sectional images after charging to 1 V (i-l).

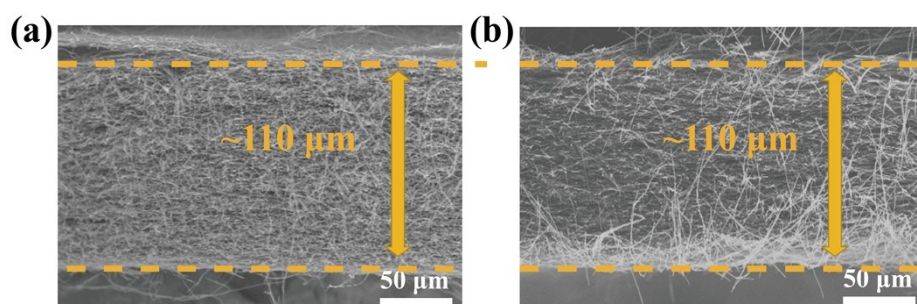

**Fig. S11.** Cross-sectional SEM images of (a) CBCNFs and (b) CNFs before electroplating.

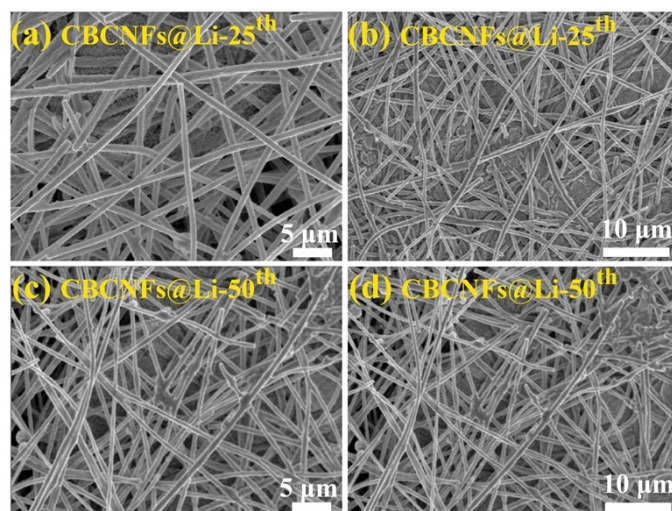

**Fig. S12.** SEM images of CBCNFs following 25 cycles (a, b) and 50 cycles (c, d) under a cycling condition of  $1 \text{ mA cm}^{-2}$  and  $1 \text{ mAh cm}^{-2}$ .

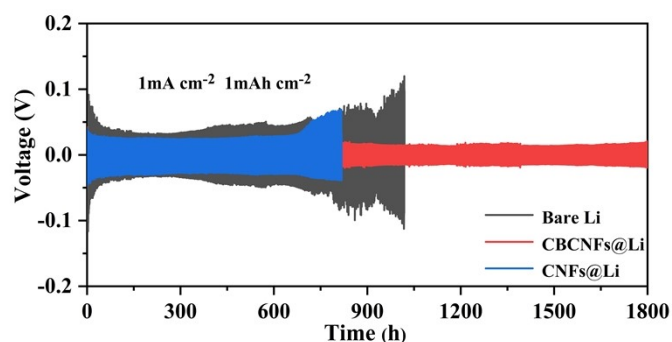

**Fig. S13.** The deposition/stripping curves of bare lithium, CBCNFs@Li, and CNFs@Li symmetric batteries at a current density of  $1 \text{ mA cm}^{-2}$  and an area capacity of  $1 \text{ mAh cm}^{-2}$ .

**Table S3** Fitted values of resistances ( $R_{ct}$ ) using the model in Fig. 6d and Fig. 6e

| Material  | Fresh $R_{ct}$ (ohm) | 25 <sup>th</sup> $R_{ct}$ (ohm) | 50 <sup>th</sup> $R_{ct}$ (ohm) | 100 <sup>th</sup> $R_{ct}$ (ohm) |
|-----------|----------------------|---------------------------------|---------------------------------|----------------------------------|
| Bare Li   | 115.20               | 19.52                           | 9.72                            | 6.06                             |
| CBCNFs@Li | 79.52                | 13.91                           | 6.93                            | 3.33                             |

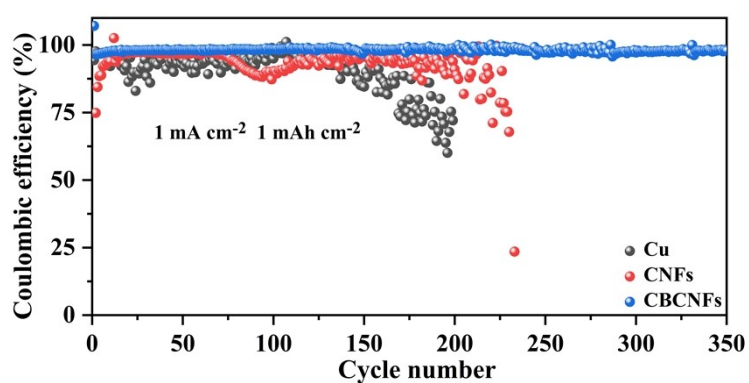

**Fig. S14.** CE of Cu||Li, CNFs||Li and CBCNFs||Li batteries at current of  $1 \text{ mA cm}^{-2}$  and capacity of  $1 \text{ mAh cm}^{-2}$ .

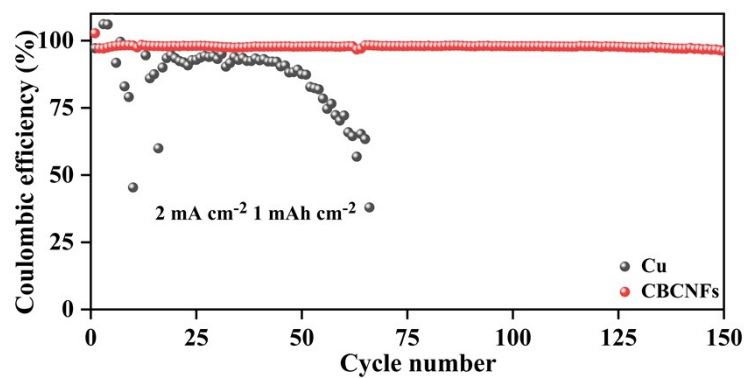

**Fig. S15.** CE of Cu||Li and CBCNFs||Li batteries at current of  $2 \text{ mA cm}^{-2}$  and capacity of  $1 \text{ mAh cm}^{-2}$ .

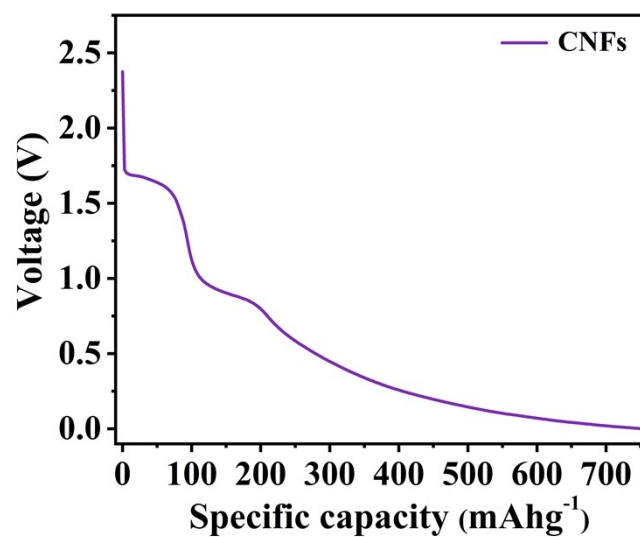

**Fig. S16.** voltage-specific capacity curve of CNFs||Li cell.

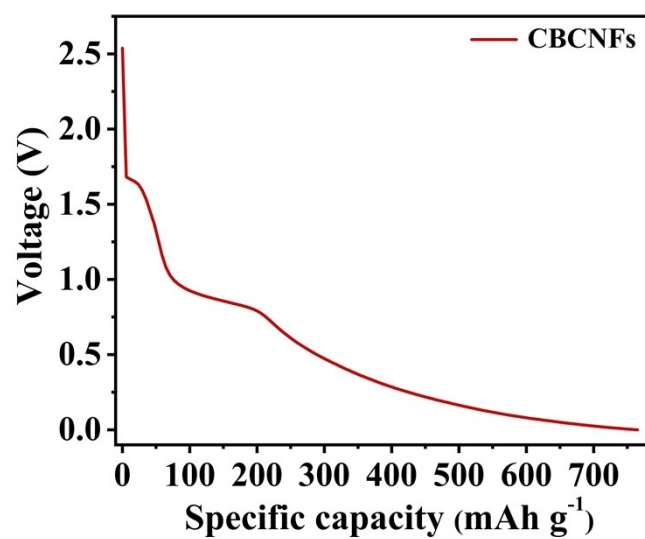

Fig. S17. voltage-specific capacity curve of CBCNFs||Li cell.

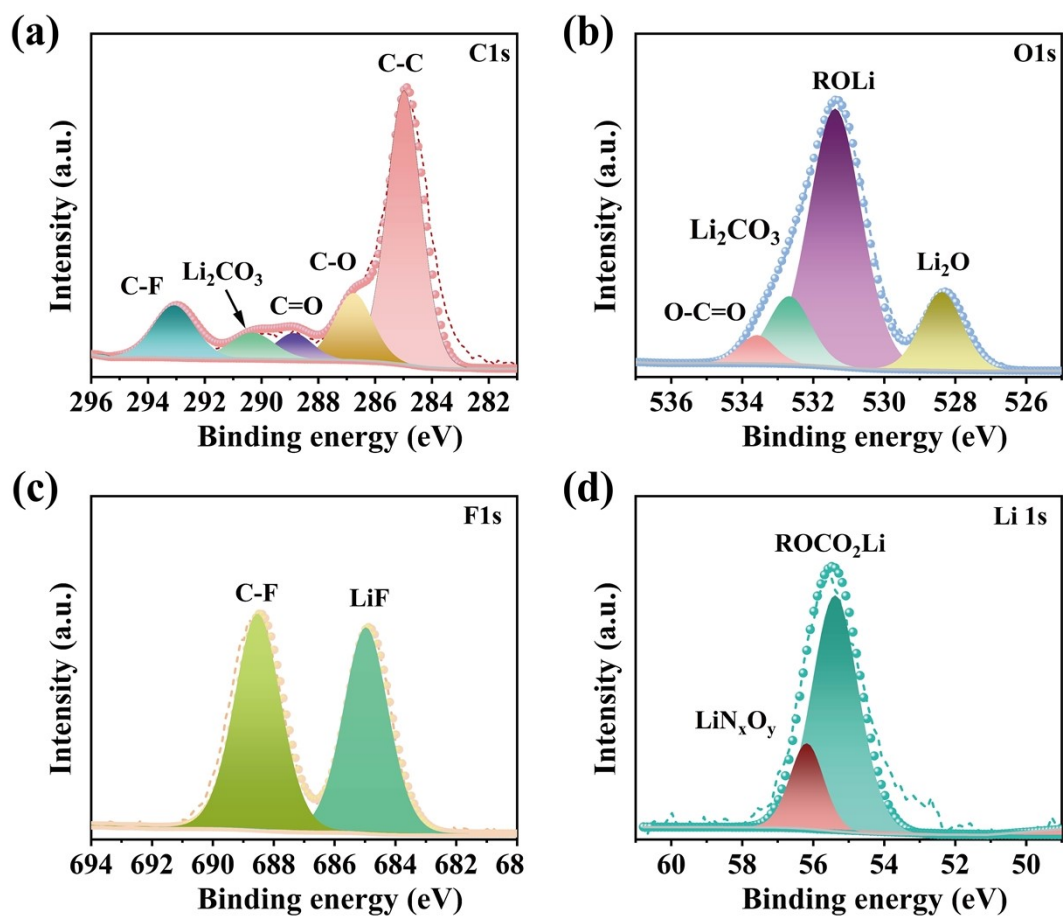

Fig. S18. (a) XPS spectra of the SEI composition on the lithium metal surface after 10 cycles of CBCNFs: (a) C1s spectrum; (b) O1s spectrum; (c) F1s spectrum; (d) Li1s spectrum
